# Supplementary material for: Development of an Optically Induced Dielectrophoresis (ODEP) Microfluidic System for High-Performance Isolation and Purification of Bacteria
Source: Biosensors (Basel). 2023 Oct 25;13(11):952. doi: 10.3390/bios13110952 (PMC10669672; doi:10.3390/bios13110952)
Supplement: Supplementary file 1 [file biosensors-13-00952-s001.zip]

Archive with 4 entries (4 files):
- Supplementary Materials.pdf
- Supplementary video S1.avi
- Supplementary video S2.avi
- Supplementary video S3.mp4
